# Supplementary material
Source: PubMed Central journal article supplement (PMC7856037)
Supplement: NIHMS1652878-supplement-Supplemental_Table.pdf [file NIHMS1652878-supplement-Supplemental_Table.pdf]

**Supplemental Table 1: Beta Coefficients for Post-Discharge VTE Risk Calculator Following Colectomy or Proctectomy for IBD**

|                              | <b>Beta Coefficient</b> | <b>95% CI</b> |
|------------------------------|-------------------------|---------------|
| <b>BMI</b>                   |                         |               |
| <18.5                        | -0.22                   | -0.89 – 0.45  |
| 18.5-24.9                    | 0.00                    | REF           |
| 25.0-29.9                    | 0.35                    | 0.00 – 0.71   |
| 30.0-34.9                    | 0.55                    | 0.14 – 0.97   |
| ≥35                          | 0.85                    | 0.40 – 1.30   |
| <b>Preoperative Steroids</b> |                         |               |
| No                           | 0.00                    | REF           |
| Yes                          | 0.65                    | 0.31 – 0.98   |
| <b>IBD Type</b>              |                         |               |
| Crohn's Disease              | 0.00                    | REF           |
| Ulcerative Colitis           | 0.57                    | 0.28 – 0.85   |
| <b>Surgical Approach</b>     |                         |               |
| Open                         | 0.00                    | REF           |
| MIS                          | 0.35                    | 0.05 – 0.65   |
| <b>Anastomotic Leak</b>      |                         |               |
| No                           | 0.00                    | REF           |
| Yes                          | 0.81                    | 0.27 – 1.34   |
| <b>Postoperative Ileus</b>   |                         |               |
| No                           | 0.00                    | REF           |
| Yes                          | 0.95                    | 0.65 – 1.26   |
| <b>Constant</b>              | -5.97                   | -6.40 – -5.54 |

Summed beta coefficients and Constant = LP  
 Predicted Probability =  $\exp(LP) / [1 + \exp(LP)]$
